# Supplementary material for: The release of hydrogen from ammonia borane over copper/hexagonal boron nitride composites
Source: Royal Society of Chemistry journal article supplement (doi:10.1039/c6ra24000c), 2016-01-01
Supplement: c6ra24000c1.pdf [file c6ra24000c1.pdf]

## The release of hydrogen from ammonia borane over copper/hexagonal boron nitride composites

*Xiaoqing Qiu, Xin Wu, Yawei Wu, Qiuwen Liu, Caijin Huang\**

State Key Laboratory of Photocatalysis on Energy and Environment, College of Chemistry, Fuzhou University, Fuzhou 350002, China.

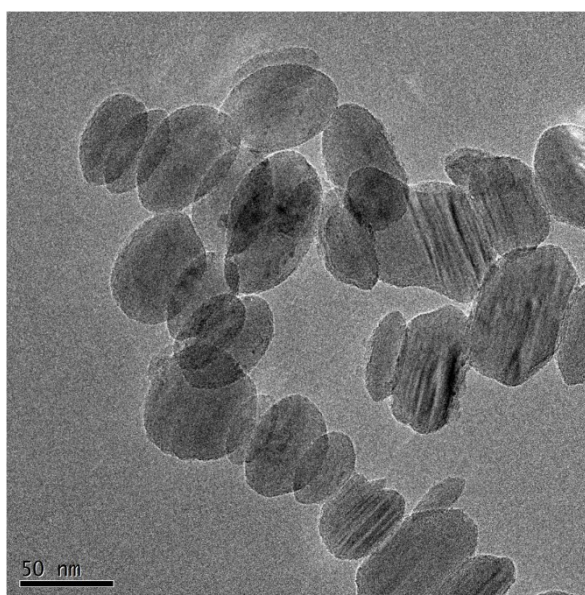

**Figure S1.** TEM image of *h*-BN nanosheets.

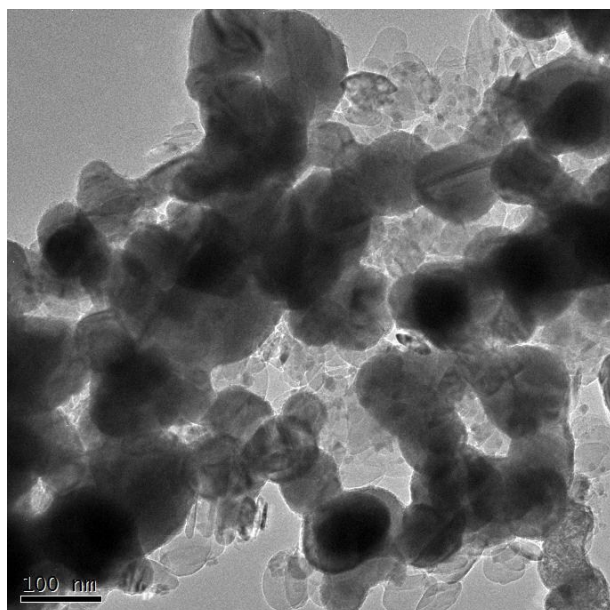

**Figure S2.** TEM image of 29.4 wt % Cu/*h*-BN catalyst after the hydrolytic reaction of AB.

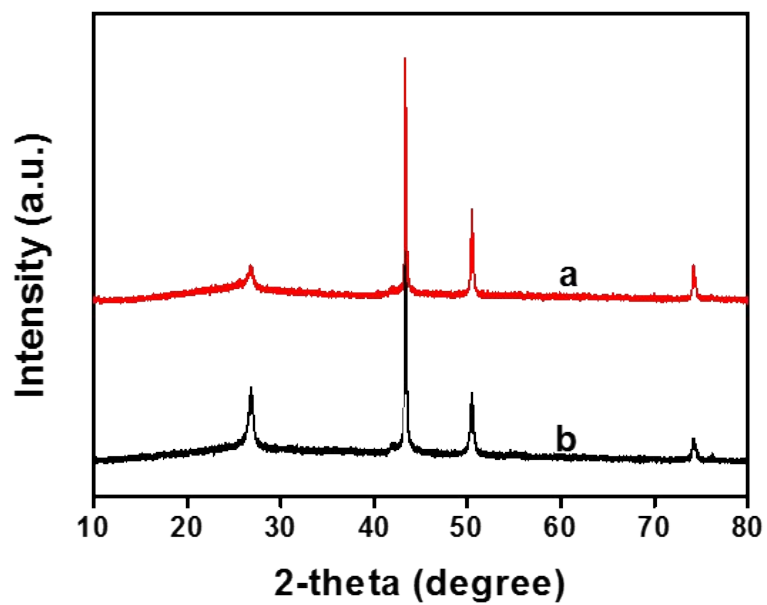

**Figure S3.** XRD patterns of 29.4 wt % Cu/BN catalyst (a) before and (b) after the reaction of hydrolysis of AB.
